# Supplementary material for: Characterization of a New Bifunctional and Cold-Adapted Polysaccharide Lyase (PL) Family 7 Alginate Lyase from Flavobacterium sp
Source: MDPI journal article supplement (doi:10.3390/md18080388), 2020-07-26
Supplement: s1 [file s1]

## Figure S1

|            |     |                                                                                 |
|------------|-----|---------------------------------------------------------------------------------|
| Original   | 1   | TGT CAA GAA AAG GCA AGT AGC AAT GCA GAT AAT ATG ATG AAA ACA GAA AAA AGA GCA AAG |
| Optimized  | 1   | TGC CAG GAA AAG GCT TCT TCC AAC GCC GAC AAC ATG ATG AAG ACT GAG AAG CGG GCT AAA |
| Amino acid | 1   | C Q E K A S S N A D N M M K T E K R A K                                         |
| Original   | 61  | AAA AAA AAG AGA AGA AAA AGG ATC AGA CTG CCT AAT ATC GAT TTA AGC CAT TGG AGT GTA |
| Optimized  | 61  | AAG AAG AAG CGA CGA AAA CGA ATC CGT CTG CCC AAC ATT GAC TTG TCT CAC TGG TCG GTG |
| Amino acid | 21  | K K K R R K R I R L P N I D L S H W S V                                         |
| Original   | 121 | ACC ATA CCC GAG TTA AAT CAA AAA GGG AGC GCG CTG AGT GTA CAA CCA CCA GAG ATC TTA |
| Optimized  | 121 | ACC ATA CCG GAA CTT AAC CAG AAG GGA AGC GCT CTT AGT GTT CAG CCC CCT GAG ATT CTG |
| Amino acid | 41  | T I P E L N Q K G S A L S V Q P P E I L                                         |
| Original   | 181 | AAT TAT GCA AAA GAC AAA AGA CTT ATT CCT TAT ATG TAT AAT GAT TCT ATA CGT GGT ACG |
| Optimized  | 181 | AAC TAC GCG AAA GAC AAG AGA CTC ATC CCC TAC ATG TAC AAC GAC TCA ATT CGA GGT ACG |
| Amino acid | 61  | N Y A K D K R L I P Y M Y N D S I R G T                                         |
| Original   | 241 | CTA GTA TTC TAC TCC TTC CCT AGT GCT GCA ACT ACT GCA AAC ACC AAA TAT ACC CGT TGT |
| Optimized  | 241 | CTG GTG TTC TAC TCT TTC CCC TCA GCT GCG ACT ACA GCC AAC ACC AAG TAT ACG CGA TGT |
| Amino acid | 81  | L V F Y S F P S A A T T A N T K Y T R C                                         |
| Original   | 301 | GAA CTA AGA GAA CAA ATG GTG CCT GGT GAC AAC AAA ACC AAT TGG ACA TTT GCT CAA GGC |
| Optimized  | 301 | GAG CTA AGA GAA CAG ATG GTG CCT GGA GAT AAC AAA ACC AAC TGG ACC TTT GCC CAG GGC |
| Amino acid | 101 | E L R E Q M V P G D N K T N W T F A Q G                                         |
| Original   | 361 | GCA AAA ATG AAA GGT GAT CTT GCC ATG GGA GAA GTT TCC AAA GAC AGT GAC GGT AAA TAT |
| Optimized  | 361 | GCC AAG ATG AAG GGT GAT CTG GCC ATG GGA GAA GTT TCC AAG GAC TCC GAC GGA AAG TAC |
| Amino acid | 121 | A K M K G D L A M G E V S K D S D G K Y                                         |
| Original   | 421 | CAC CGA GTA ATT ATT ATG CAA ATT CAC GGC ATA TTG ACC GAT GAG CAA CGT GAT TTA ATA |
| Optimized  | 421 | CAC CGA GTC ATC ATC ATG CAG ATC CAT GGC ATT CTG ACC GAC GAG CAA AGA GAT CTC ATT |
| Amino acid | 141 | H R V I I M Q I H G I L T D E Q R D L I                                         |
| Original   | 481 | GGT CAA AAA GAT AAT AAT GCA CCA CCA ATA TTA AAA ATT TAT TGG CAA GAT GGT AAA ATT |
| Optimized  | 481 | GGC CAA AAG GAC AAT AAT GCT CCC CCT ATT TTG AAA ATC TAC TGG CAG GAC GGC AAG ATC |
| Amino acid | 161 | G Q K D N N A P P I L K I Y W Q D G K I                                         |
| Original   | 541 | AGA GTT AAA ACC AAA ATC TTG AAA AAC CTC AAC GCT ACC GGA CCT GAT CTA TTG CAC GAA |
| Optimized  | 541 | CGG GTC AAG ACT AAG ATT CTC AAG AAC CTA AAT GCA ACT GGA CCA GAC CTG CTG CAT GAG |
| Amino acid | 181 | R V K T K I L K N L N A T G P D L L H E                                         |
| Original   | 601 | GAG GCC TGG GAC GAT GAC GAT GGT TTT AAT TTT GAA CAA GAA GTT GGA TTT GGT CGA TTT |
| Optimized  | 601 | GAG GCC TGG GAC GAC GAT GAC GGT TTC AAC TTT GAG CAG GAG GTT GGT TTT GGC CGG TTC |
| Amino acid | 201 | E A W D D D D G F N F E Q E V G F G R F                                         |
| Original   | 661 | ACA CTC GAA GTA AAA GTA TCT GAC GGC GAA ATG GTA ATA ATC TTG AAT AAC AGC GAG TAC |
| Optimized  | 661 | ACC CTG GAG GTC AAG GTA AGT GAT GGC GAG ATG GTT ATT ATT CTC AAC AAC TCG GAG TAC |
| Amino acid | 221 | T L E V K V S D G E M V I I L N N S E Y                                         |
| Original   | 721 | AAA GTT TAC GAC GGT ATT CAC ATG AGG AAA TGG GGA ATA TTC GAA AAT TAT TTT AAA GCC |
| Optimized  | 721 | AAG GTC TAC GAT GGC ATC CAC ATG CGA AAG TGG GGT ATC TTC GAG AAC TAC TTC AAG GCC |
| Amino acid | 241 | K V Y D G I H M R K W G I F E N Y F K A                                         |
| Original   | 781 | GGA AAT TAT TTT CAA TCC AGA GAT GAA GGC GCT TAT GCA AGG GTT AAA TAT TAC AAG CTA |
| Optimized  | 781 | GGC AAT TAT TTC CAG TCC AGG GAT GAG GGA GCC TAT GCT CGC GTG AAA TAC TAC AAG CTC |
| Amino acid | 261 | G N Y F Q S R D E G A Y A R V K Y Y K L                                         |
| Original   | 841 | GAA GTA AGC CAT                                                                 |
| Optimized  | 841 | GAA GTG AGC CAC                                                                 |
| Amino acid | 281 | E V S H                                                                         |

**Figure S1.** Comparison between the original and the codon-optimized *alyS02* gene sequences without signal sequence and stop codon. The mutation sites introduced by codon optimization were highlighted in red, and the deduced amino acid sequence encoded by both the genes was shown below.

Figure S2

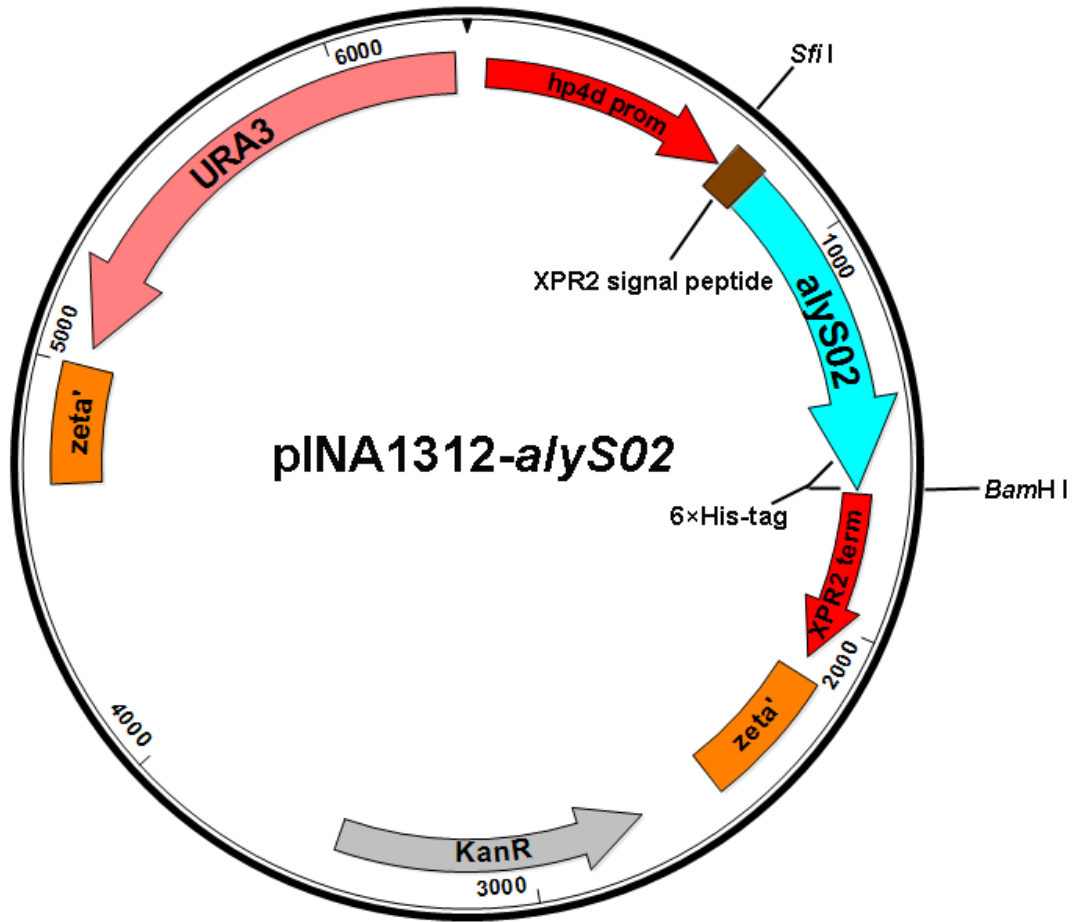

Figure S2. Recombinant plasmid pINA1312-alyS02 for expression of alginate lyase AlyS02.
